# Supplementary material
Source: PubMed Central journal article supplement (PMC3129435)

## Supplementary Figure 1

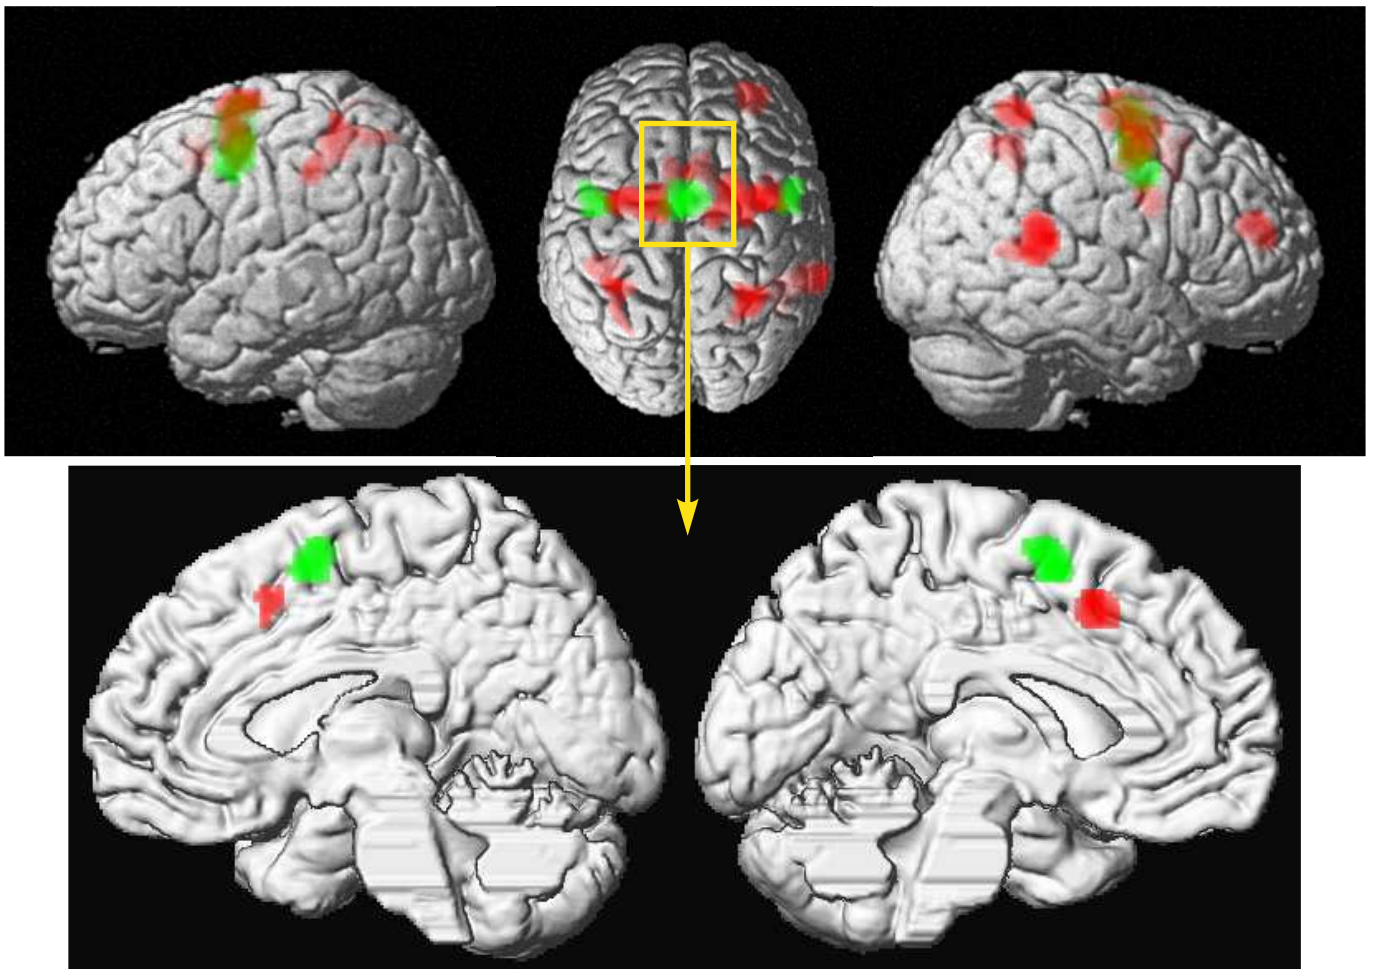

# Supplementary Figure 2

## Effect on distance measure and cluster algorithms

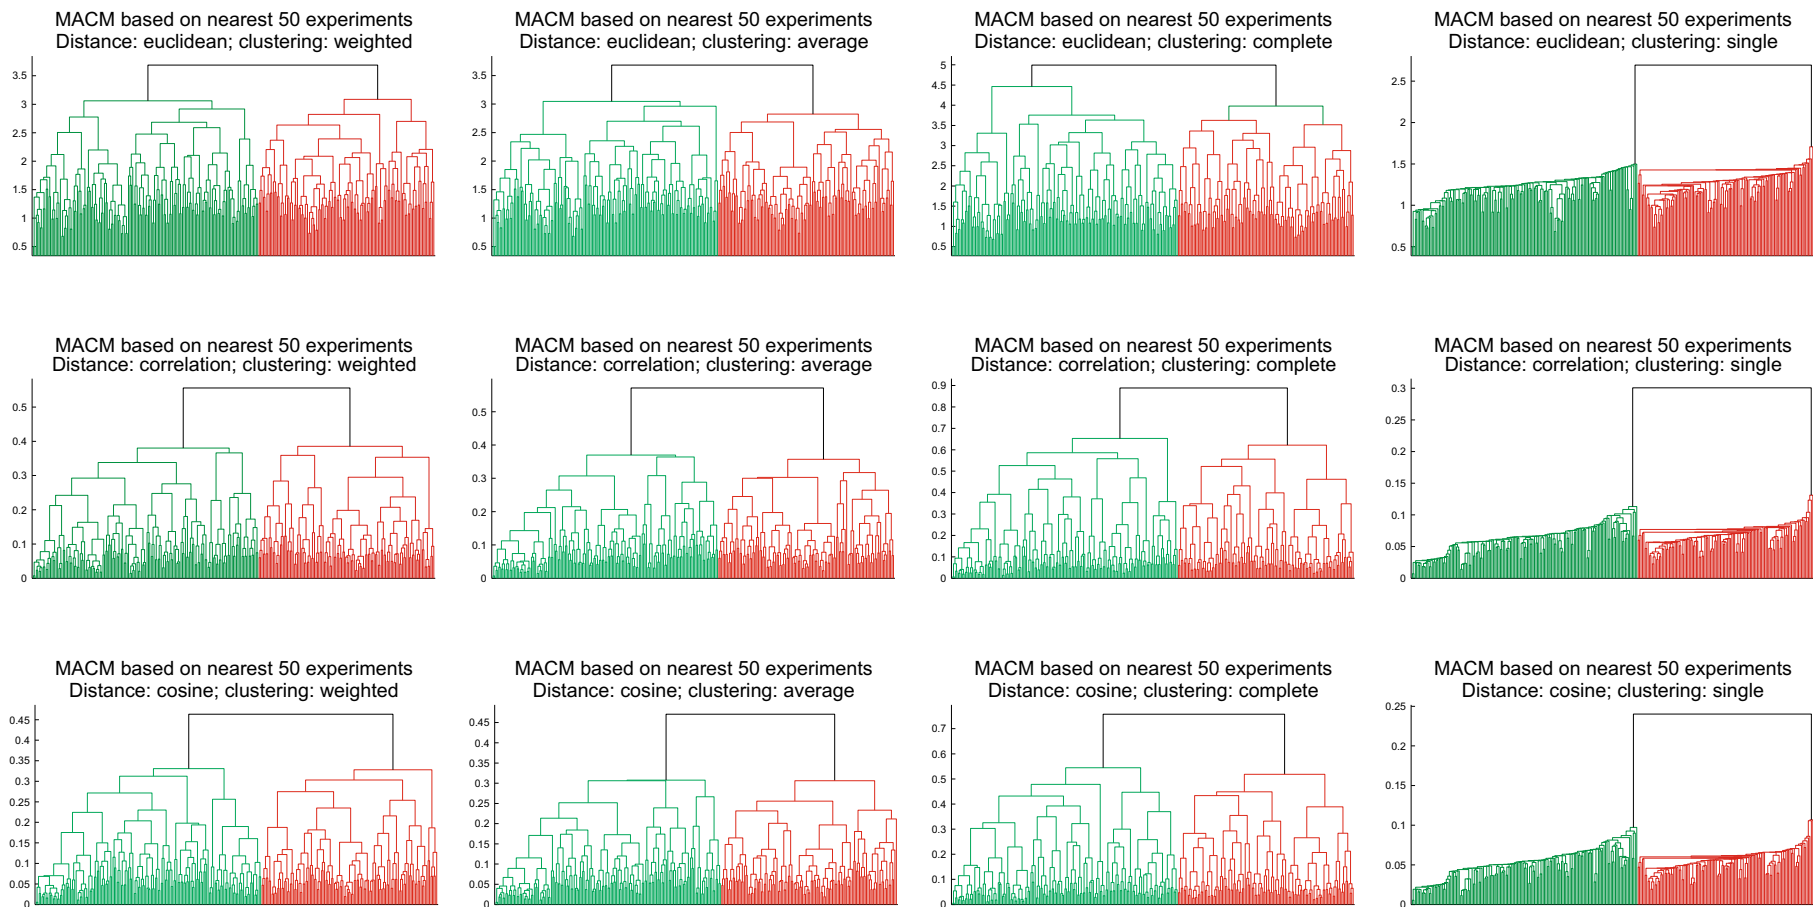



# Supplementary Figure 4

MACM based on nearest 25 experiments

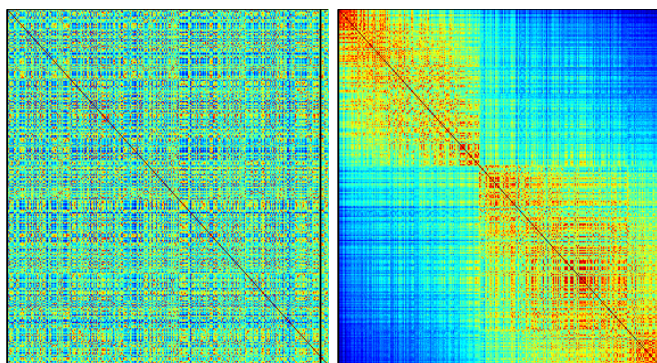

MACM based on nearest 50 experiments

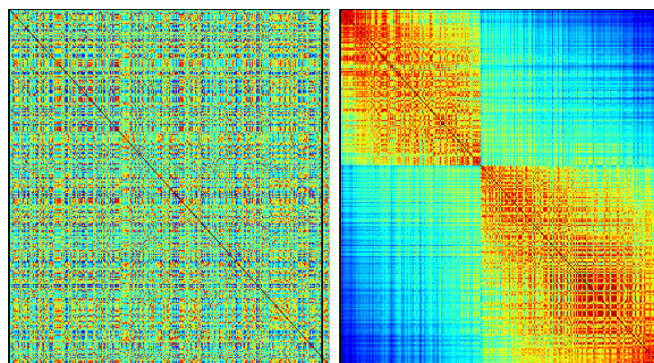

MACM based on nearest 100 experiments

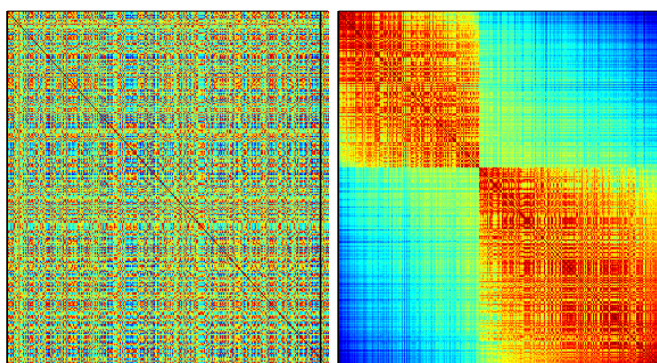

MACM based on nearest 250 experiments

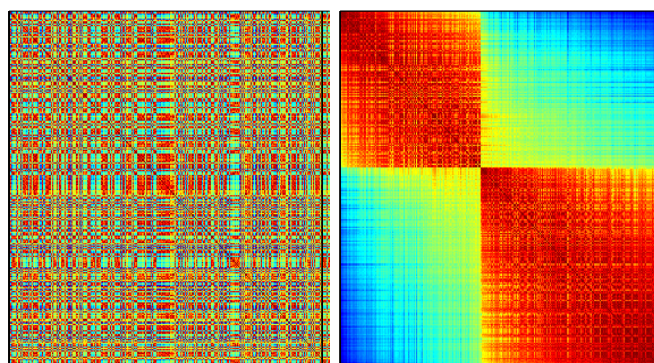

MACM based on experiments within 4mm

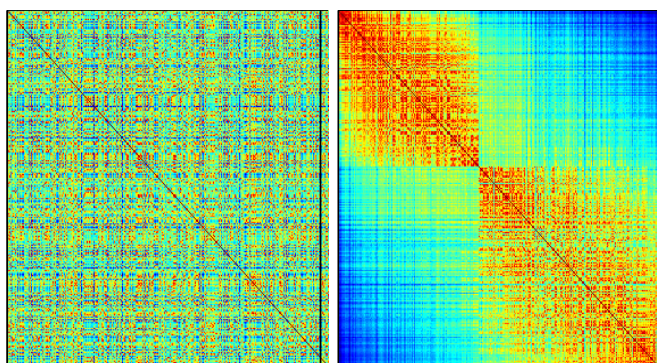

MACM based on experiments within 6mm

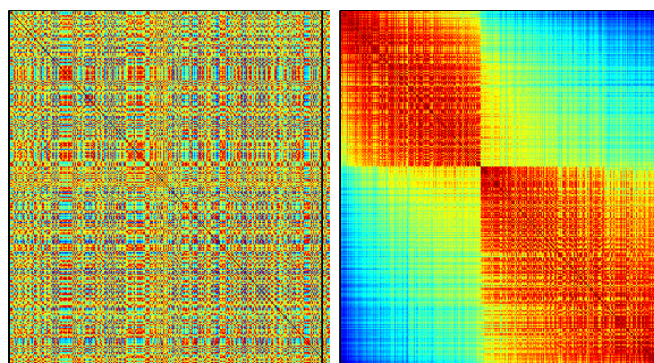

# Supplementary Figure 5

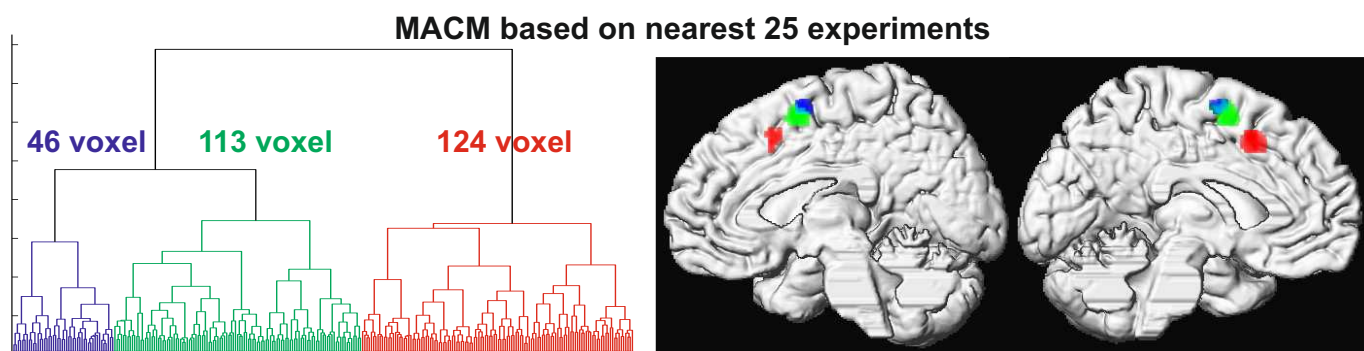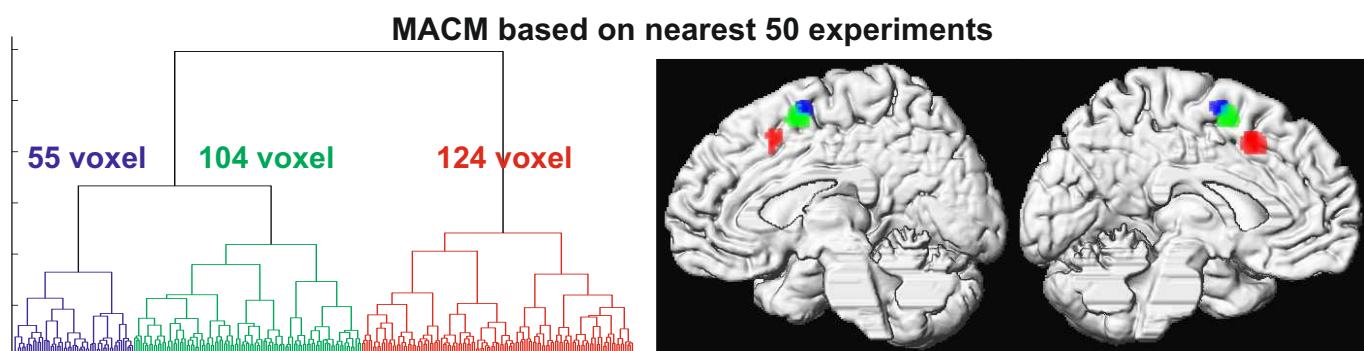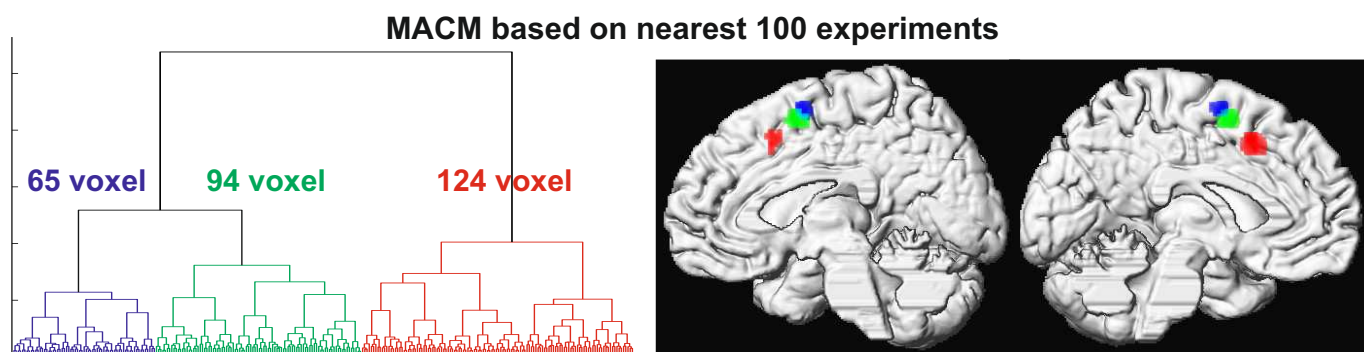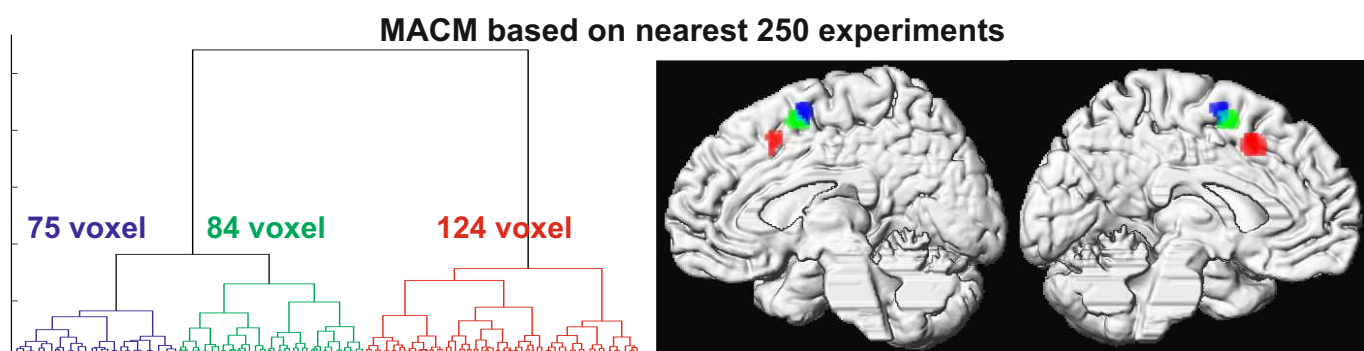

# Supplementary Figure 6

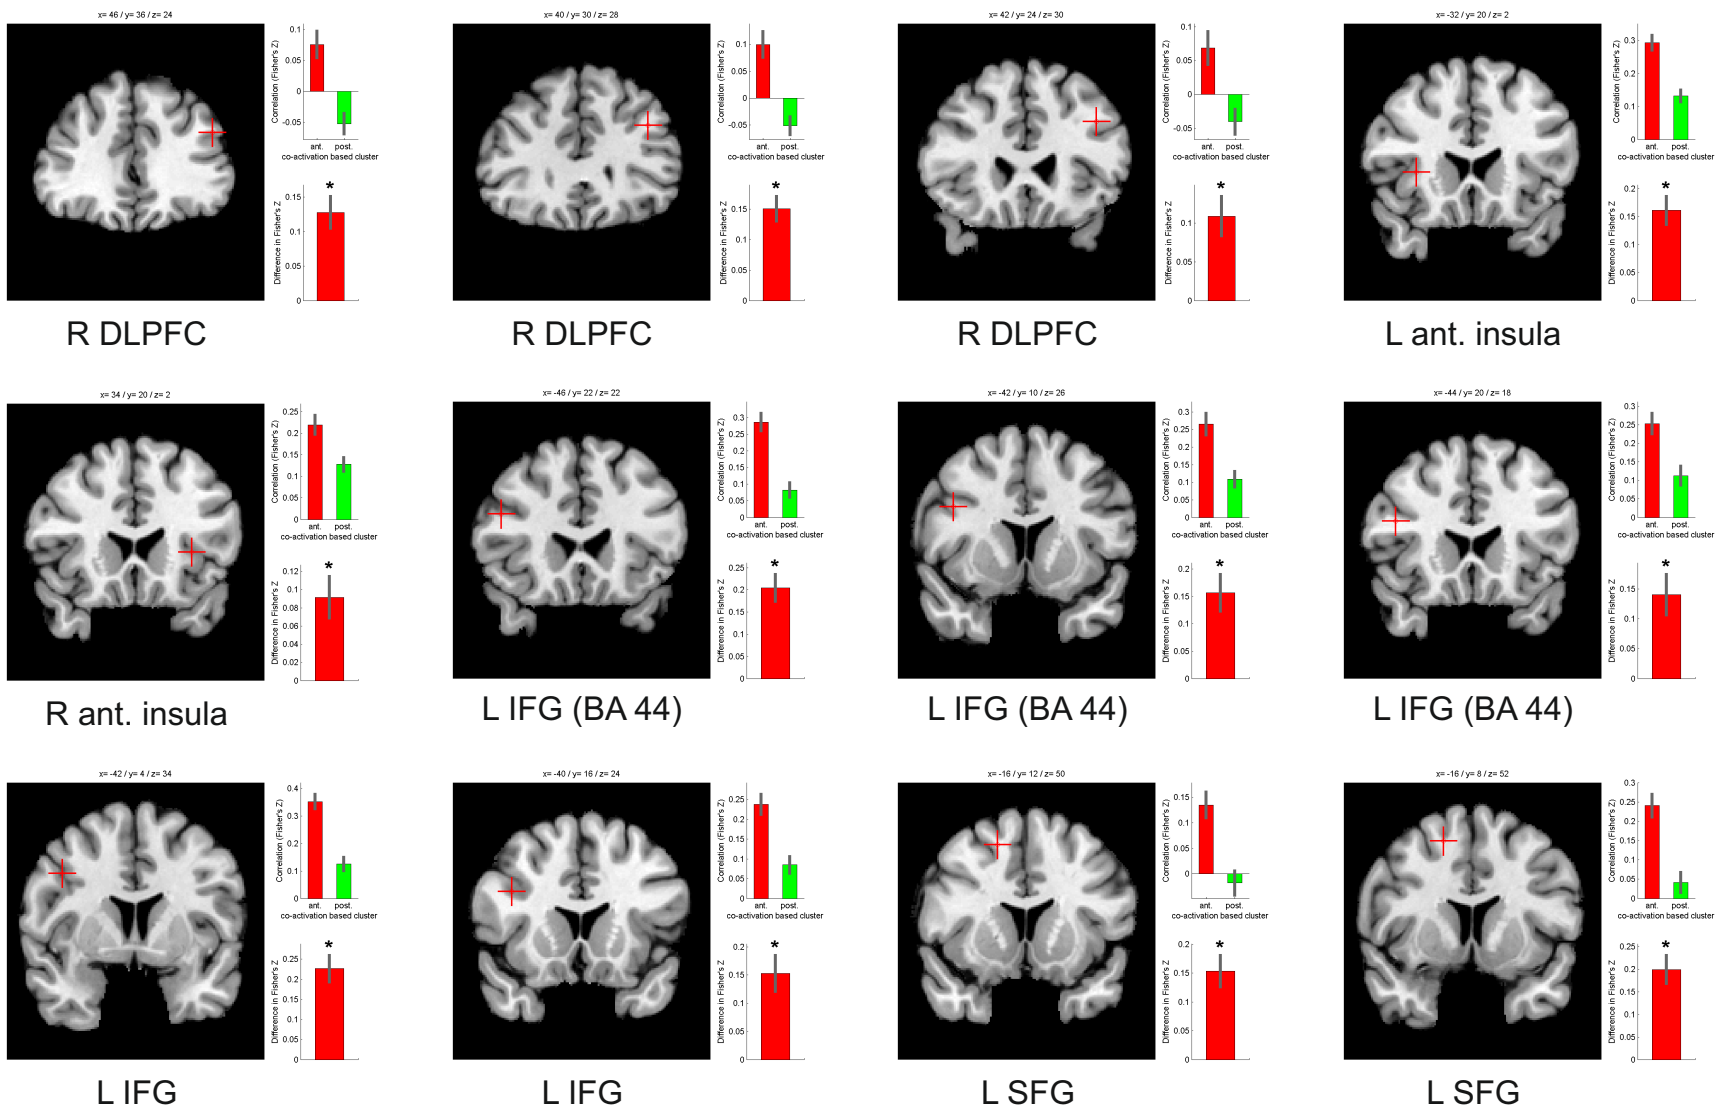

# Supplementary Figure 7

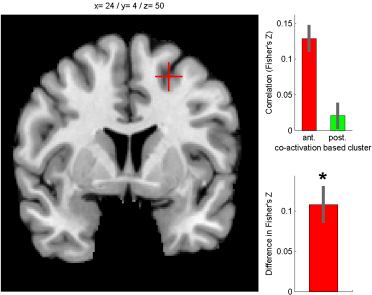

R SFG

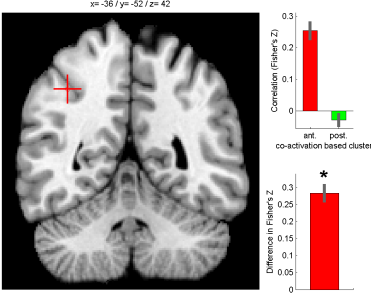

L aIPS (HIP3)

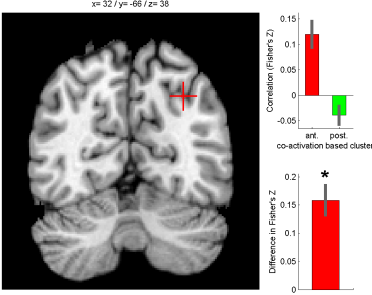

R pIPS

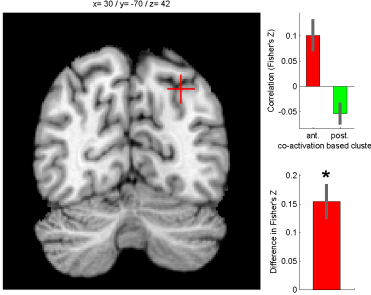

R SPL (7PC)

# Supplementary Figure 8

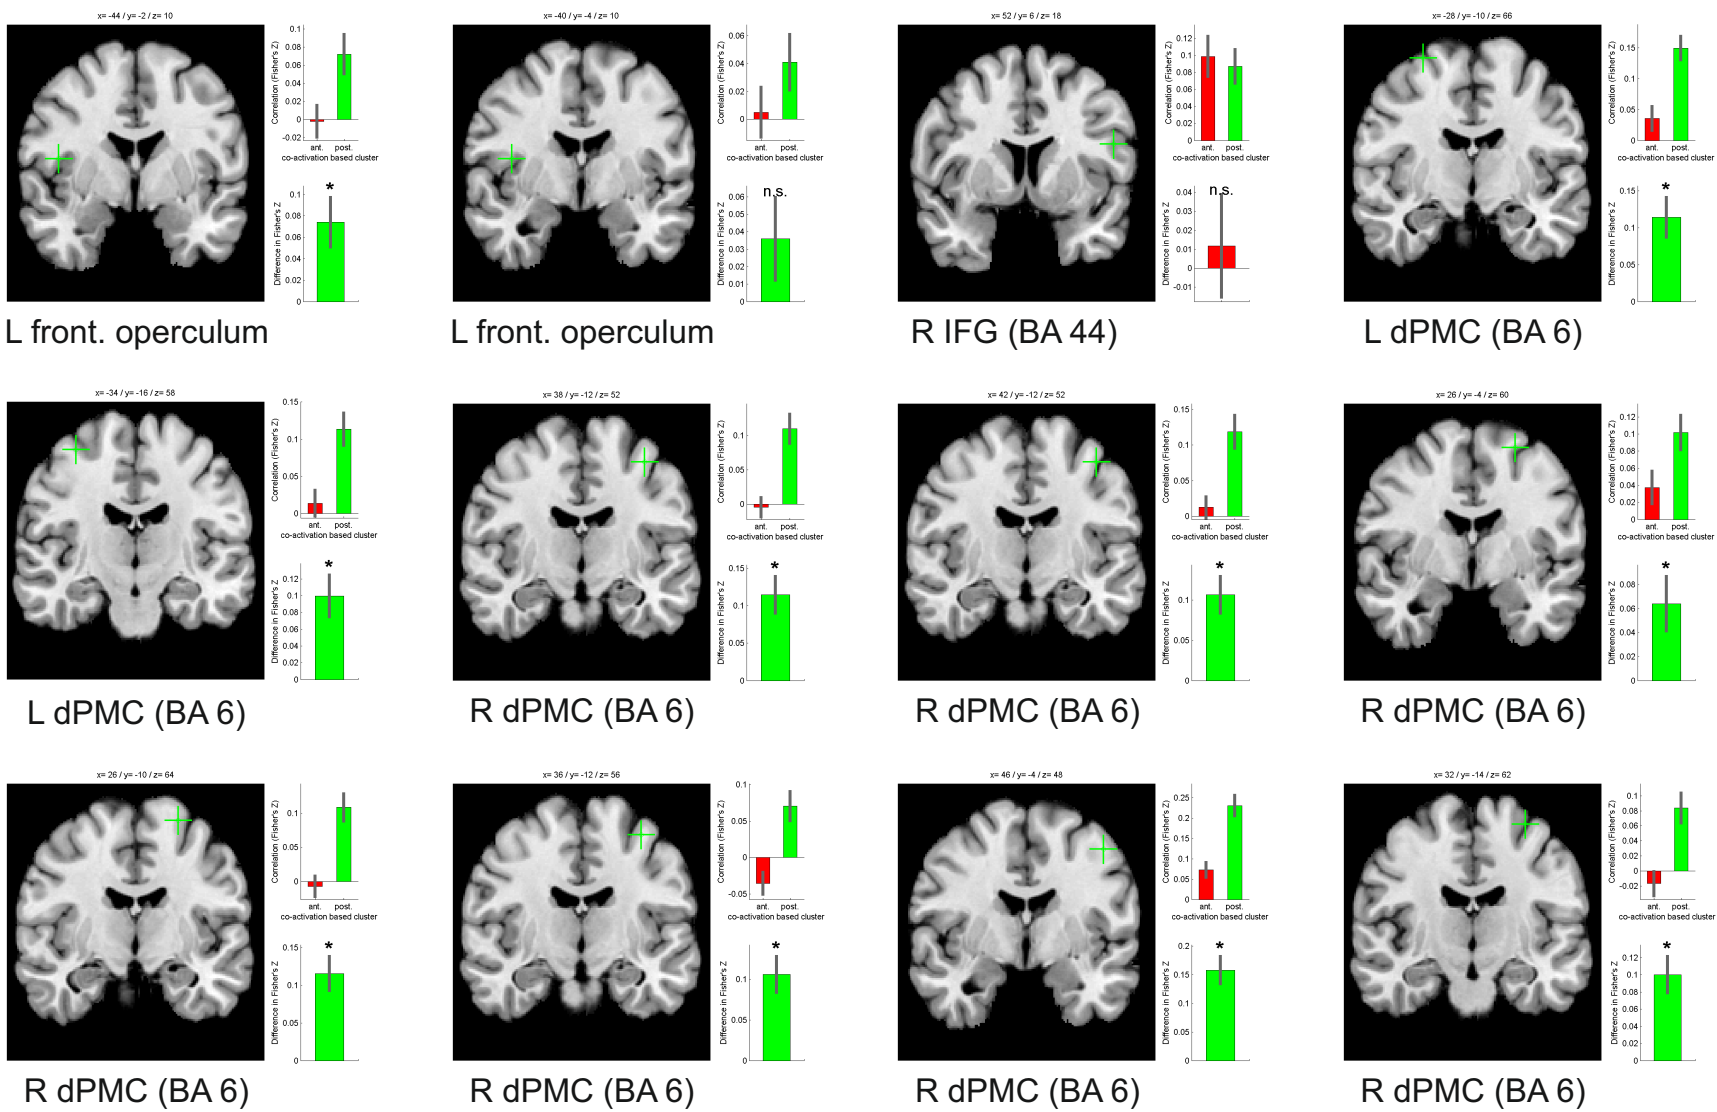



# Supplementary Figure 9

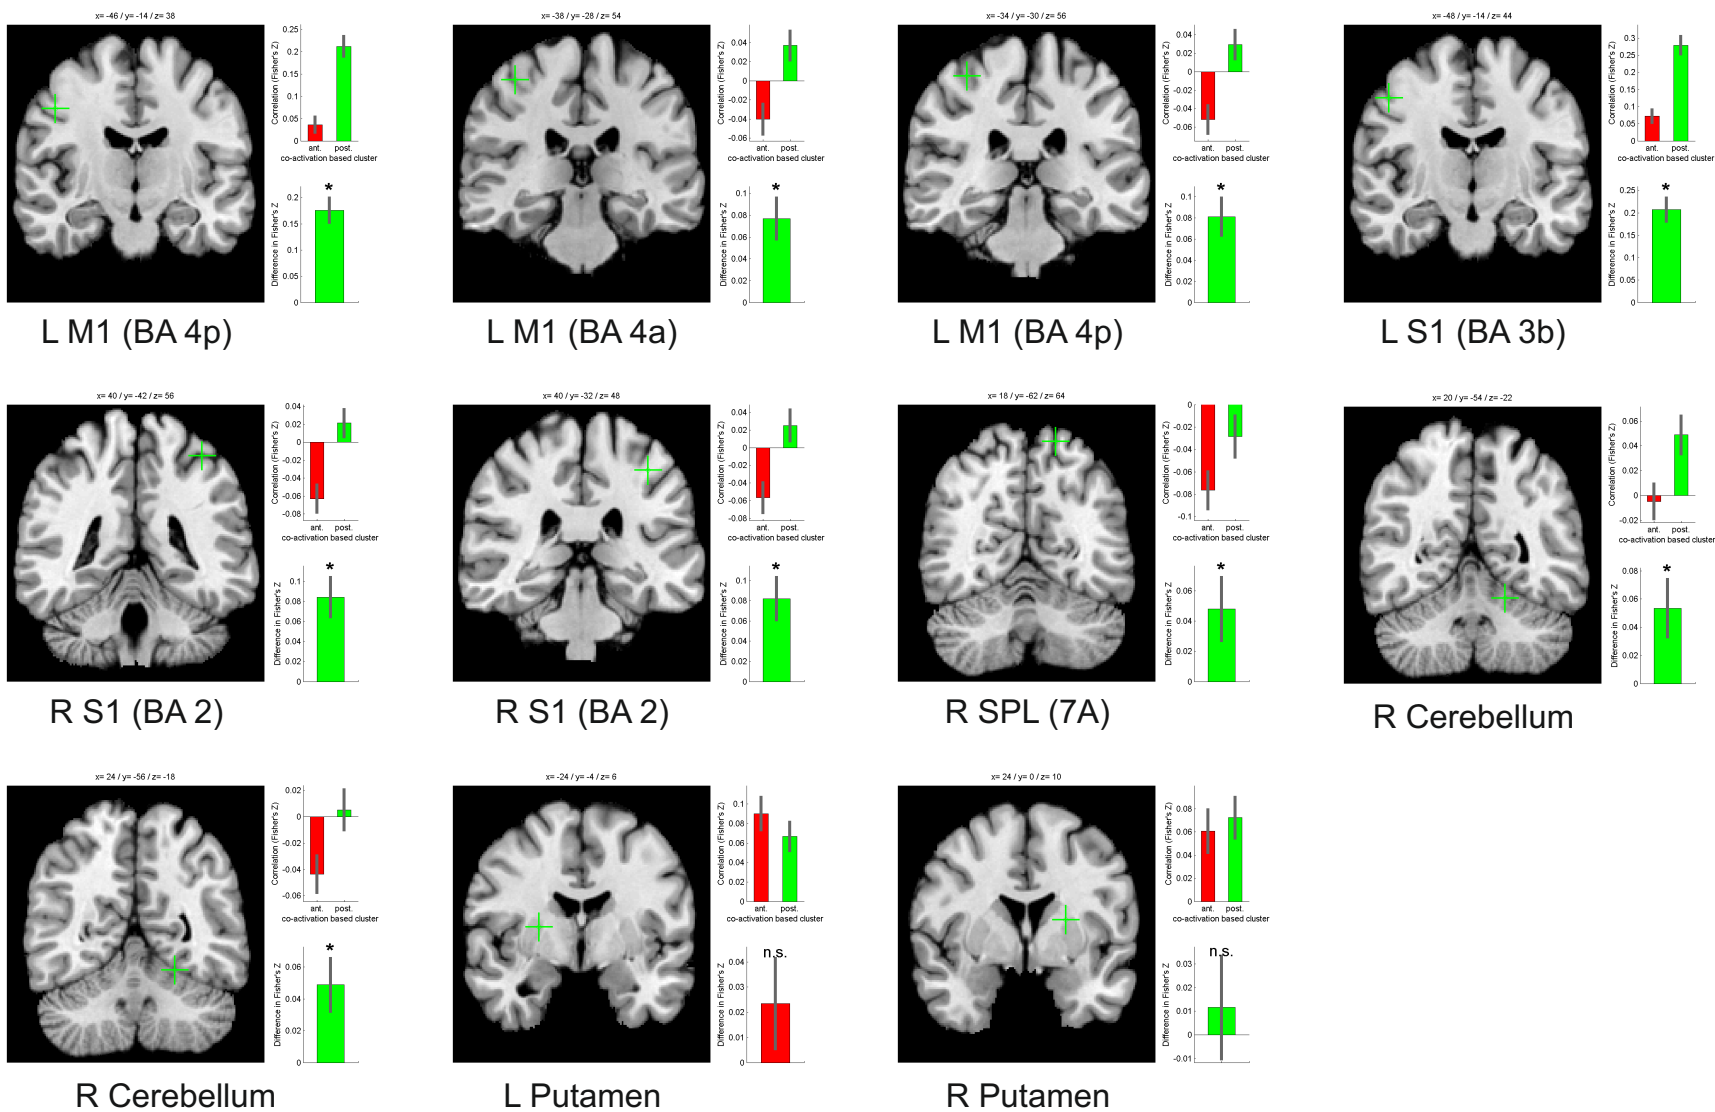

Supplement: NIHMS297376-supplement-02.pdf [file NIHMS297376-supplement-02.pdf]
